# Supplementary material for: The regulatory function of the d-orbital structure in TM@g-t-C4N3 for bifunctional catalysis of the oxygen evolution/reduction reaction
Source: Royal Society of Chemistry journal article supplement (doi:10.1039/d3cp04249a), 2023-11-29
Supplement: d3cp04249a1.pdf [file d3cp04249a1.pdf]

*Supporting Information for*

**The regulatory function of d-orbital structure in TM@g-t-C<sub>4</sub>N<sub>3</sub> for bifunctional  
catalysis of oxygen evolution/reduction reaction**

Zhenduo Wang, Meichen Wu, Yuhong Huang, Jianmin Zhang \*, Xiumei Wei \*

School of Physics and Information Technology, Shaanxi Normal University, Xi'an, 710119, China

\*Corresponding author. E-mail: [weixiumei@snnu.edu.cn](mailto:weixiumei@snnu.edu.cn) (X. Wei); [jmzhang@snnu.edu.cn](mailto:jmzhang@snnu.edu.cn) (J.

Zhang).

## Computational details for OER/ORR process

The reaction pathways of OER and ORR in acidic media are as follows:

The OER contains four elementary reaction steps:

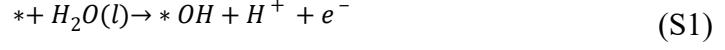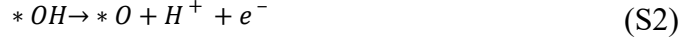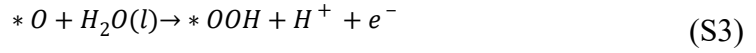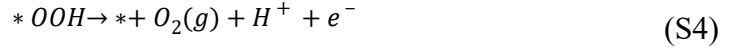

As the reverse reaction of OER, the ORR involves four inverse steps:

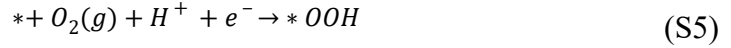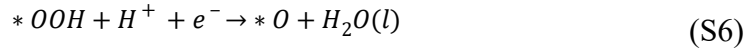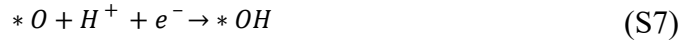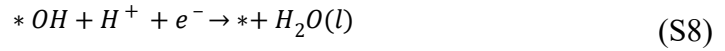

The adsorption energies of reaction species (\*OH, \*O and \*OOH) can be calculated by:

$$\Delta E_{*OH} = E_{*OH} - E_* - E_{OH} = E_{*OH} - E_* - (E_{H_2O} - 1/2E_{H_2}) \quad (S9)$$

$$\Delta E_{*O} = E_{*O} - E_* - E_O = E_{*O} - E_* - (E_{H_2O} - E_{H_2}) \quad (S10)$$

$$\Delta E_{*OOH} = E_{*OOH} - E_* - E_{OOH} = E_{*OOH} - E_* - (2E_{H_2O} - 3/2E_{H_2}) \quad (S11)$$

where  $E_{H_2O}$  and  $E_{H_2}$  are the energies of  $H_2O$  and  $H_2$  molecules in gas phase, respectively.

According to previous work,<sup>1</sup> their adsorption Gibbs free energies can be approximated as:

$$\Delta G_{*OH} = \Delta E_{*OH} + 0.35 \text{ eV} \quad (S12)$$

$$\Delta G_{*O} = \Delta E_{*O} + 0.05 \text{ eV} \quad (S13)$$

$$\Delta G_{*OOH} = \Delta E_{*OOH} + 0.40 \text{ eV} \quad (S14)$$

Therefore, the reaction Gibbs free energies of steps (S1) - (S8) can be calculated by:

$$\Delta G_1 = \Delta G_{*OH} \quad (S15)$$

$$\Delta G_2 = \Delta G_{*O} - \Delta G_{*OH} \quad (S16)$$

$$\Delta G_3 = \Delta G_{*OOH} - \Delta G_{*O} \quad (S17)$$

$$\Delta G_4 = 4.92 \text{ eV} - \Delta G_{*OOH} \quad (S18)$$

$$\Delta G_5 = \Delta G_{*OOH} - 4.92 \text{ eV} \quad (S19)$$

$$\Delta G_6 = \Delta G_{*O} - \Delta G_{*OOH} \quad (S20)$$

$$\Delta G_7 = \Delta G_{*OH} - \Delta G_{*O} \quad (S21)$$

$$\Delta G_8 = -\Delta G_{*OH} \quad (S22)$$

Hence the theoretical overpotentials of OER and ORR can be expressed as:

$$\eta^{OER} = \frac{\max\{\Delta G_1, \Delta G_2, \Delta G_3, \Delta G_4\}}{e} - 1.23 \text{ V} \quad (S23)$$

$$\eta^{ORR} = \frac{\max\{\Delta G_5, \Delta G_6, \Delta G_7, \Delta G_8\}}{e} + 1.23 \text{ V} \quad (S24)$$

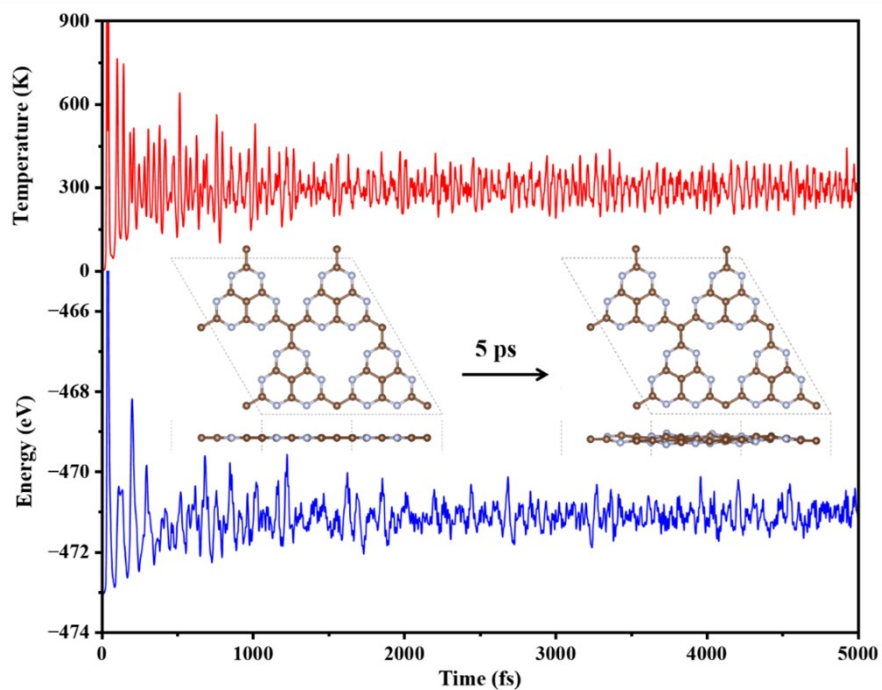

**Fig. S1.** The trends of temperature and total energy of g-t-C<sub>4</sub>N<sub>3</sub> against time during the AIMD simulations at a temperature of 300 K. The insets show the top and side views of atomic structures of g-t-C<sub>4</sub>N<sub>3</sub> before and after a 5-ps evolution.

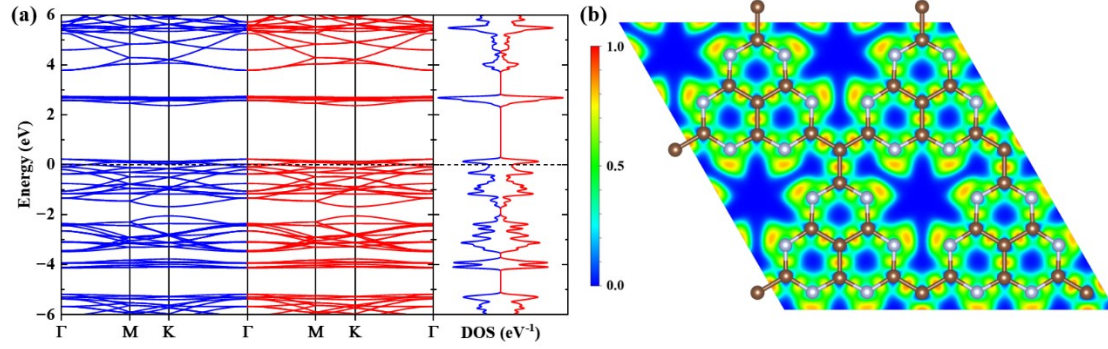

**Fig. S2.** (a) The spin-polarized band structure and DOS of g-t-C<sub>4</sub>N<sub>3</sub>. The spin-up and spin-down channels are marked in blue and red, respectively. The Fermi level is set to zero and plotted with black dashed line. (b) The ELF of g-t-C<sub>4</sub>N<sub>3</sub>. The color scale stands for the value of ELF.

Fig. S2(a) shows the spin-polarized band structure and DOS of pristine g-t-C<sub>4</sub>N<sub>3</sub>. It can be seen that the pristine slab exhibits nonmagnetic property due to the symmetric curves of spin-up and spin-down parts. Fig. S2(b) depicts the electron localization function (ELF)<sup>2,3</sup> of g-t-C<sub>4</sub>N<sub>3</sub>. It is known that the ELF can be used to investigate the localized properties of electrons. To be specific, a value of zero (one) for ELF represents a fully non-localized (localized) state, while a value of 0.5 represents an electron-gas-like state. The six N atoms around the pore have relatively localized electrons, which implies that the TM@g-t-C<sub>4</sub>N<sub>3</sub> might be stable when TM atoms are embedded in the pore.

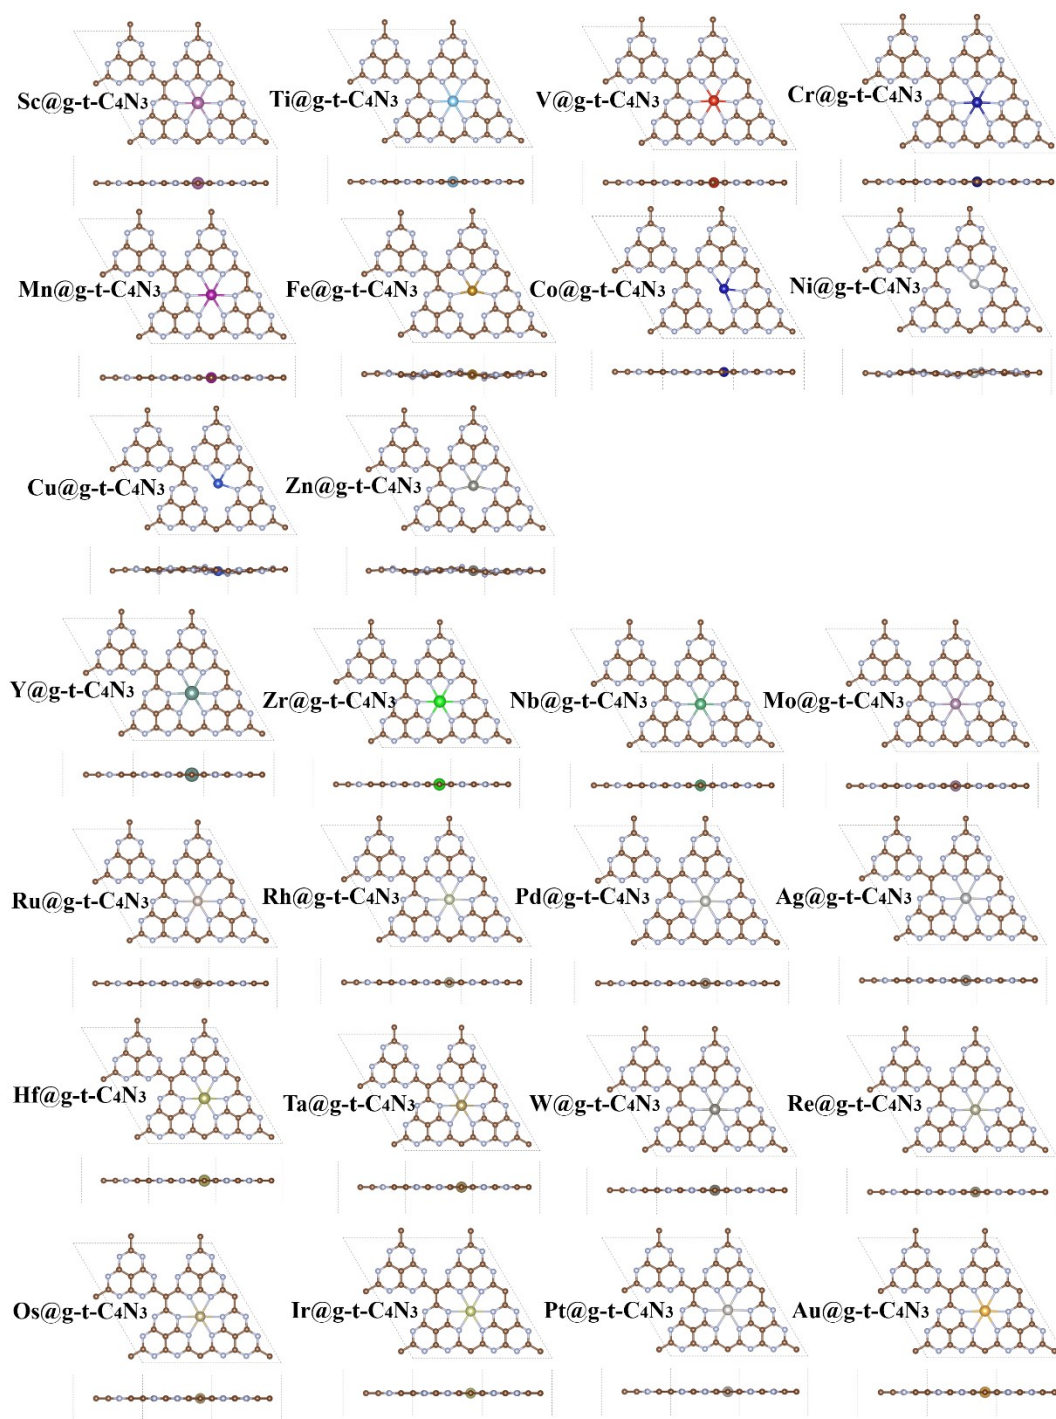

**Fig. S3.** Optimized structures of TM@g-t-C<sub>4</sub>N<sub>3</sub>. The brown and gray balls represent C and N atoms, respectively, and the balls with other colors represent corresponding TM atoms.



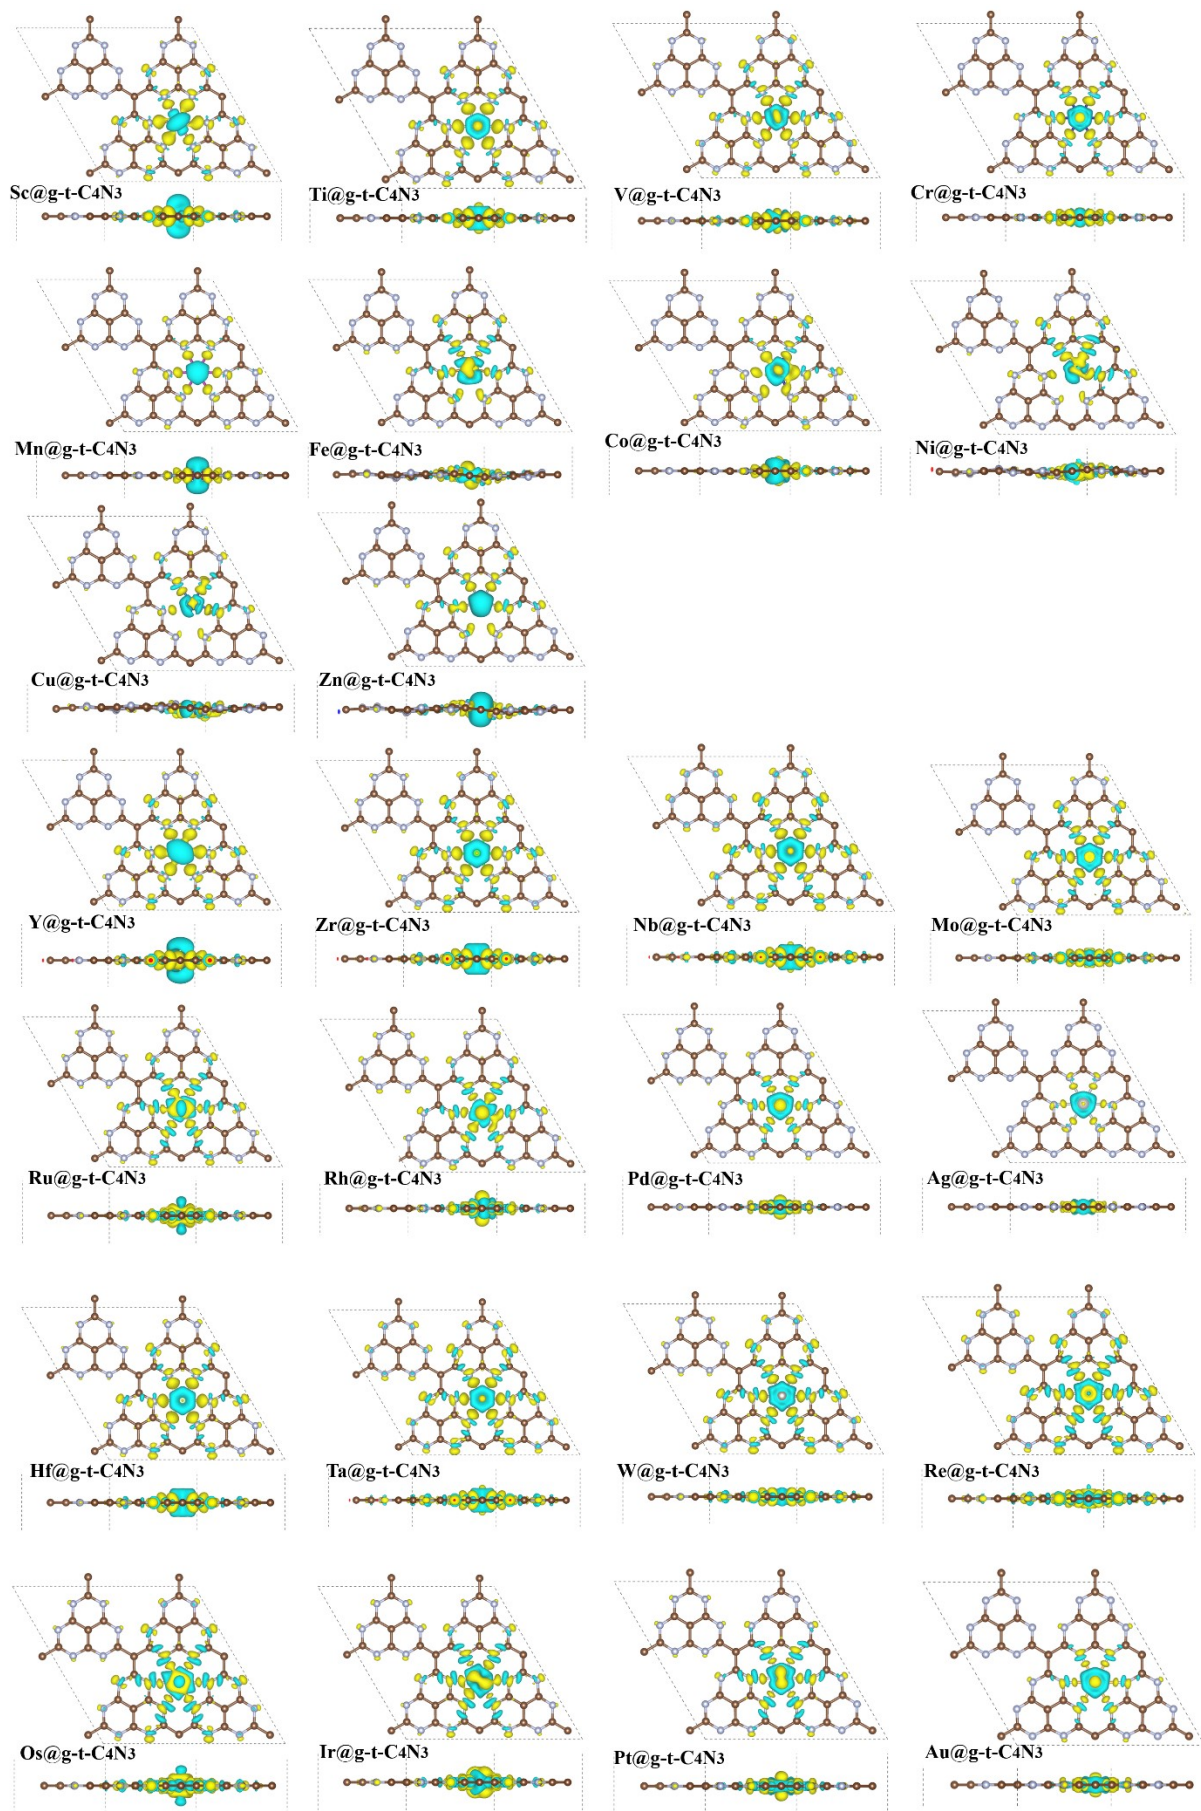

**Fig. S4.** The charge density difference of TM@g-t-C<sub>4</sub>N<sub>3</sub>. The yellow and cyan represent accumulation and depletion of electrons with the isovalue of 0.005 e<sup>-</sup>/bohr<sup>3</sup>.

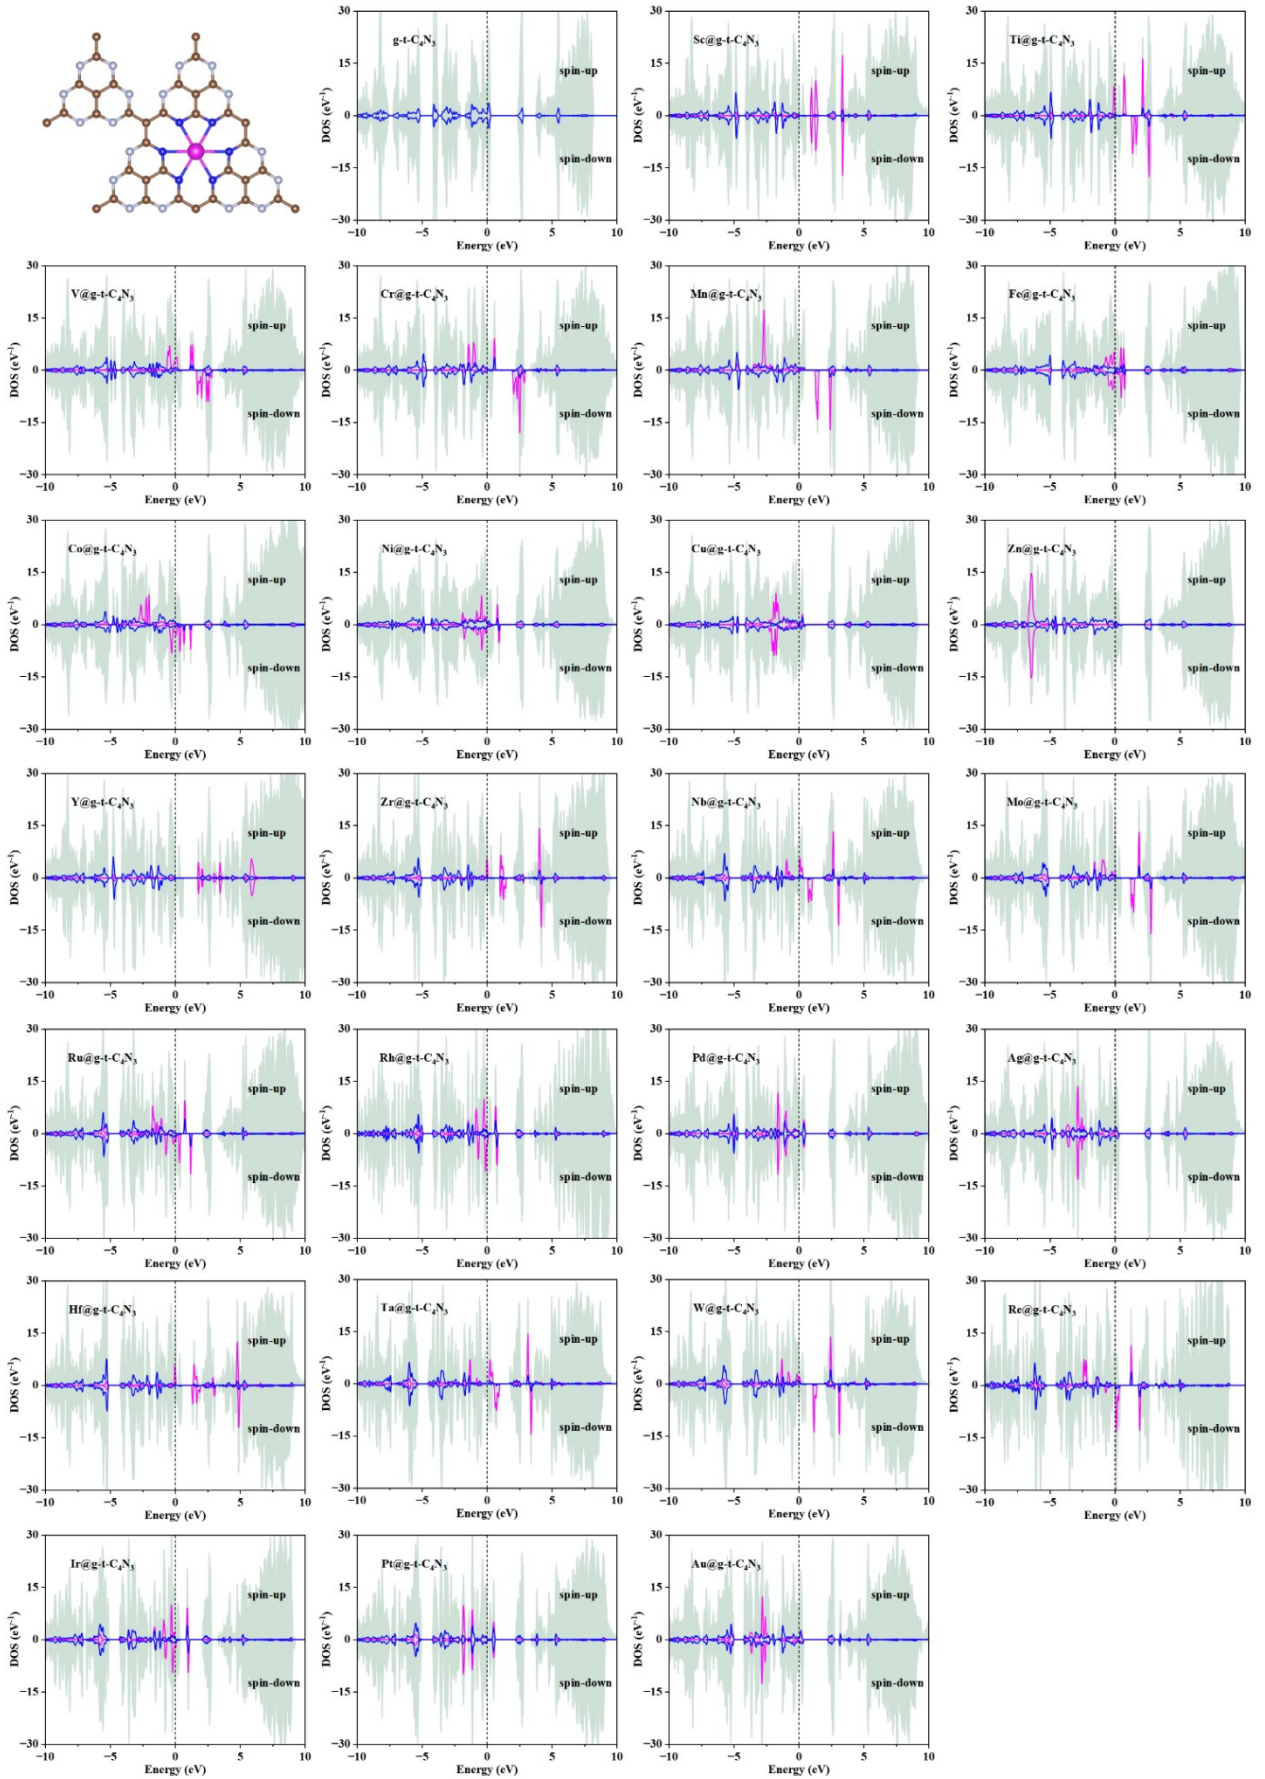

**Fig. S5.** The first subfigure shows the selected atoms (N atoms in blue and TM atom in magenta) in the structure of  $\text{TM@g-t-C}_4\text{N}_3$ . The others show the PDOS for corresponding structures with light-turquoise parts for total DOS, blue curves for p-states of selected N atoms and magenta curves for d-states of TM atom.



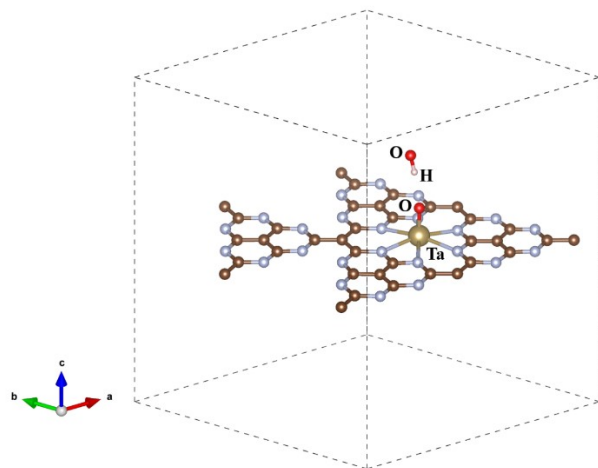

**Fig. S6.** The optimized structure of OOH group adsorbed on Ta@g-t-C<sub>4</sub>N<sub>3</sub>.

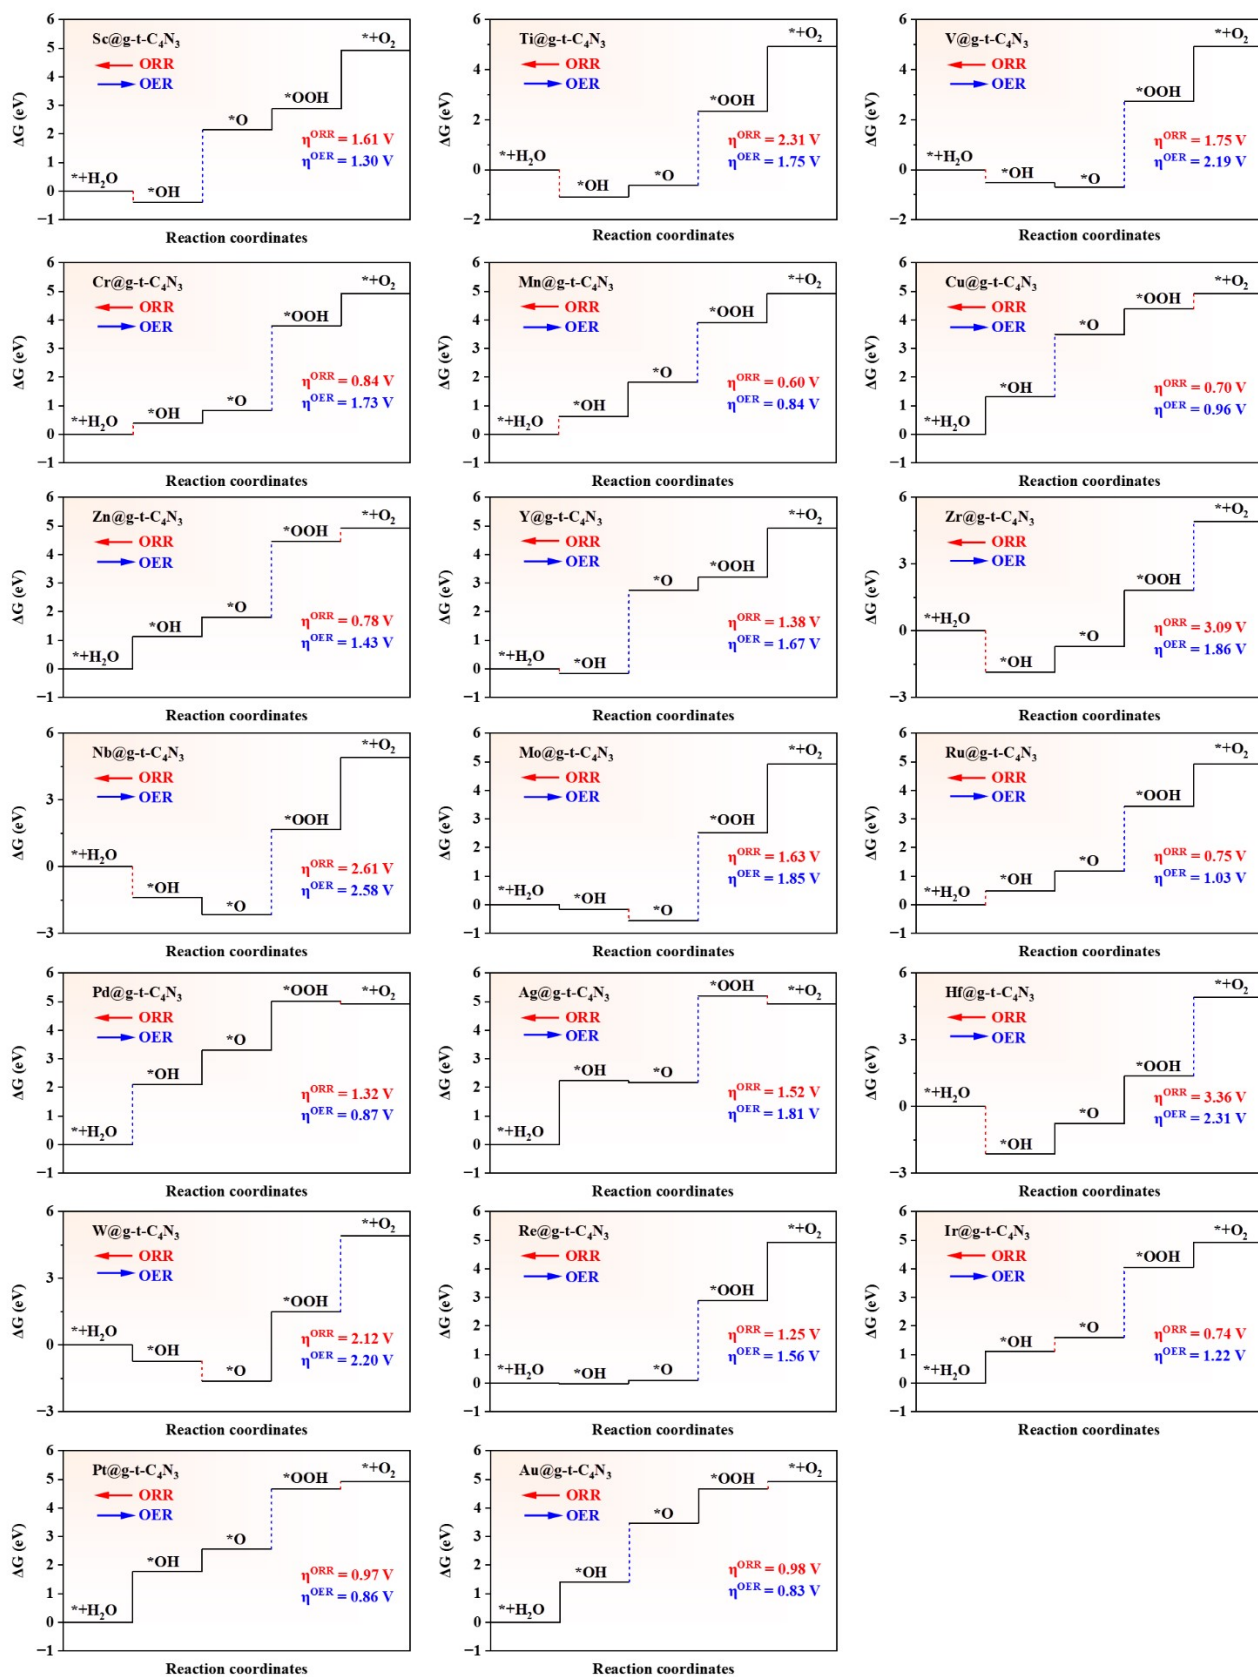

**Fig. S7.** The Gibbs free energy diagrams of TM@g-t-C<sub>4</sub>N<sub>3</sub> for OER/ORR. The PDS is marked in blue/red dashed line for OER/ORR.

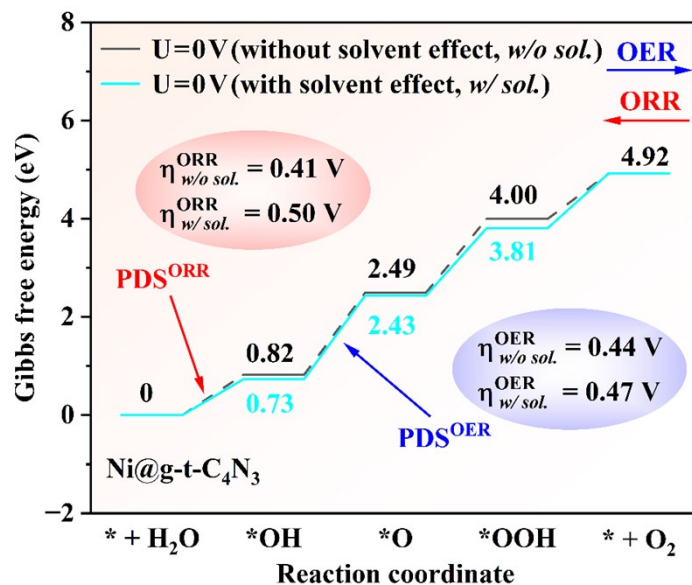

**Fig. S8.** The Gibbs free energy diagram of  $\text{Ni@g-t-C}_4\text{N}_3$  before and after the consideration of solvent effects.

Taking the excellent  $\text{Ni@g-t-C}_4\text{N}_3$  catalyst as an example, as shown in Fig. S8, both the Gibbs free energies and the overpotentials before and after the consideration of solvent effects are not significantly different. The overpotential difference of OER (ORR) with and without the consideration of solvent effects is only 0.03 V (0.09 V). It indicates that the solvent effects can be neglected for  $\text{Ni@g-t-C}_4\text{N}_3$ . Therefore, the solvent effects are not further considered in the work.

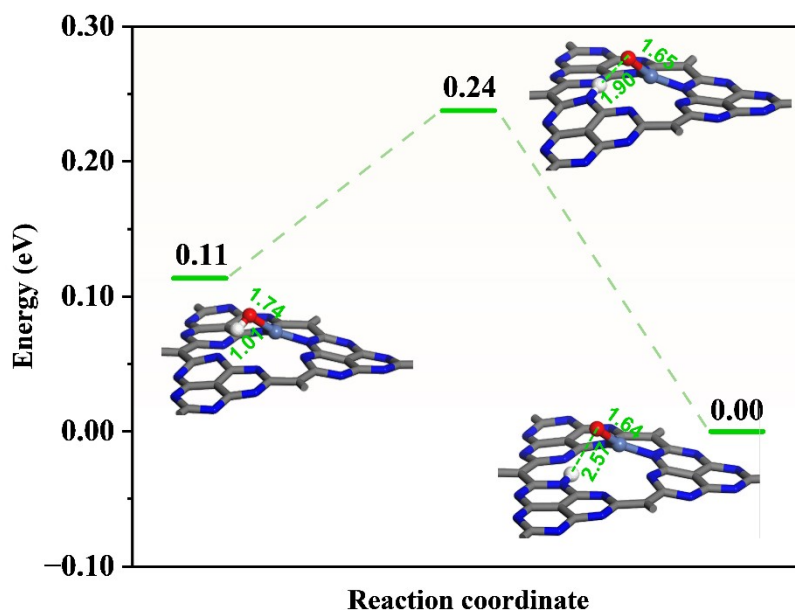

Fig. S9. The energy curve of transition states of \*OH to \*H-\*O. The energy of \*H-\*O adsorbed on Ni@g-t-C<sub>4</sub>N<sub>3</sub> is set to zero.

The Climbing Image-Nudged Elastic Band (CI-NEB) method was used to study the transition states and reaction kinetics.<sup>4</sup> Take the decomposition of \*OH on the Ni@g-t-C<sub>4</sub>N<sub>3</sub> as an example. The energy curve shows that the energy barrier from \*OH to \*H-\*O on Ni@g-t-C<sub>4</sub>N<sub>3</sub> is 0.13 eV, which is a relatively small barrier and means that the \*OH intermediate on Ni@g-t-C<sub>4</sub>N<sub>3</sub> is easy to decompose into \*H-\*O. However, the process shown here exhibited exothermic property which is different from that in the \*OH to \*O process. The main reason might be the structure of \*H-\*O is not the corresponding one (\*O on the Ni@g-t-C<sub>4</sub>N<sub>3</sub>) involved in the OER process considered in this work. Therefore, we think that this approach might be a rough approximation for the investigation of transition states and reaction kinetics in the four-step OER mechanism. The transition states and the reaction kinetics of OER/ORR catalyzed by the g-t-C<sub>4</sub>N<sub>3</sub> based SACs should be further investigated in a more detailed way.

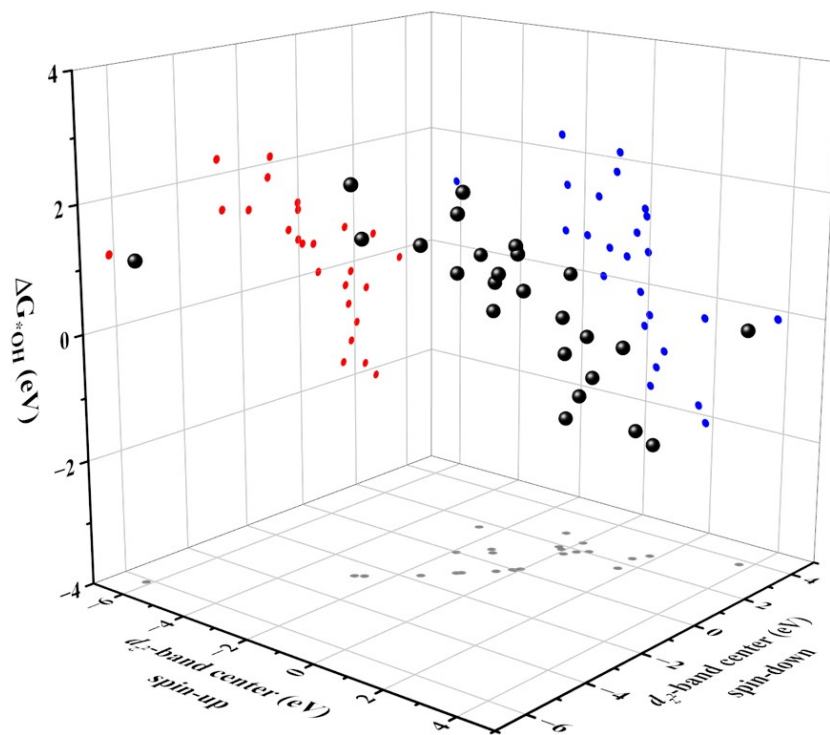

Fig. S10. The variation of  $\Delta G_{*OH}$  versus spin-polarized  $d_{z^2}$ -band centers.

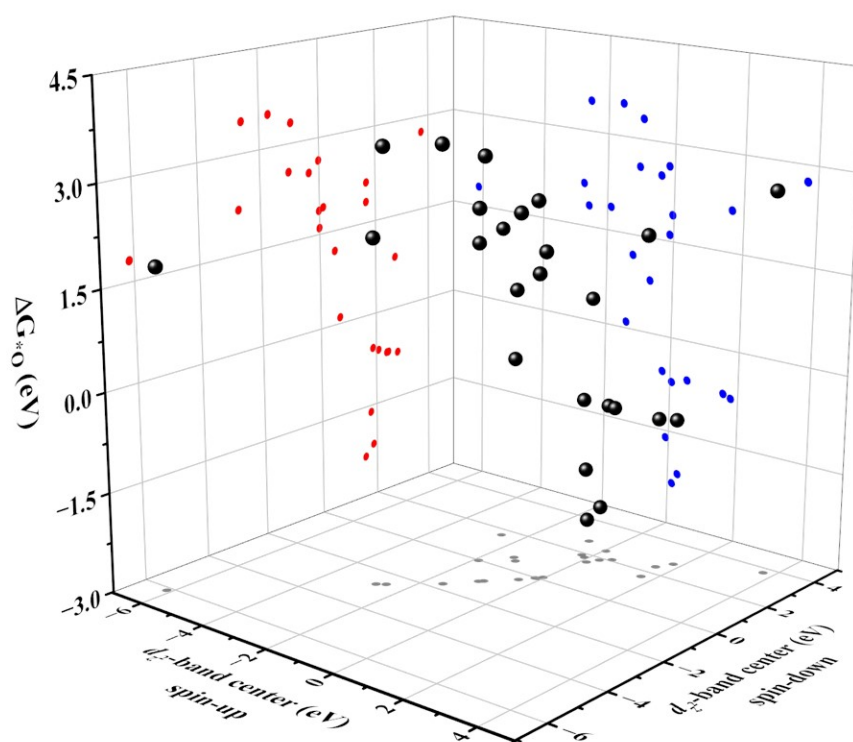

Fig. S11. The variation of  $\Delta G_{*O}$  versus spin-polarized  $d_{z^2}$ -band centers.



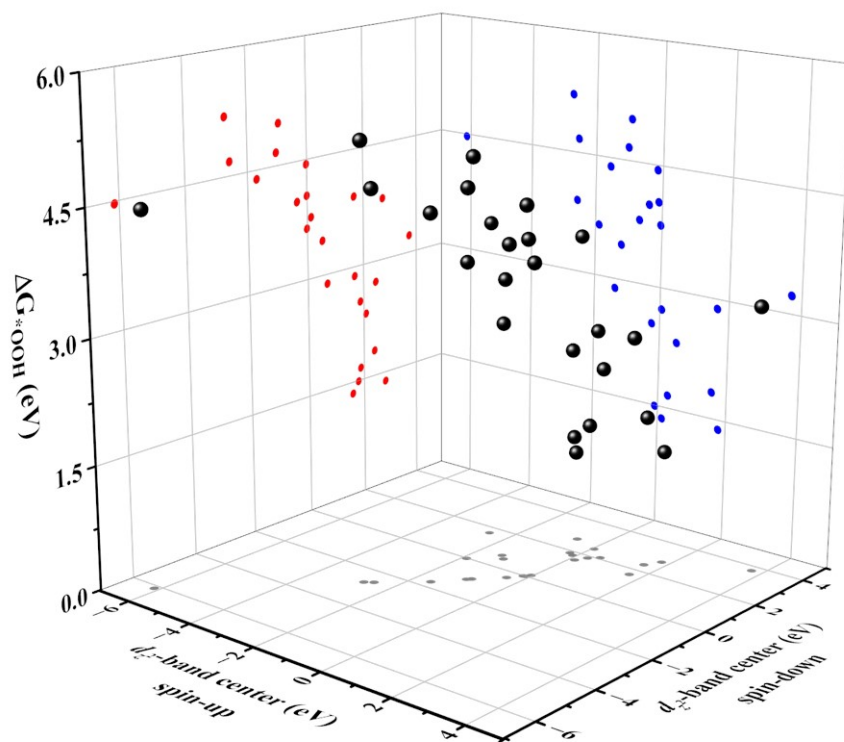

Fig. S12. The variation of  $\Delta G_{*OOH}$  versus spin-polarized  $d_{z^2}$ -band centers.

**Table S1.** The  $E_f$ ,  $Z$ ,  $U_{bulk}^0$ ,  $U_{dis}$  and  $E_{dis}$  of TM@g-t-C<sub>4</sub>N<sub>3</sub>.

| <b>TM</b> | $E_b$ (eV) | $E_f$ (eV)  | $Z^*$ | $U_{bulk}^0$ (V) | $U_{dis}$ (V) | $E_{dis}$ (V) |
|-----------|------------|-------------|-------|------------------|---------------|---------------|
| <b>Sc</b> | -11.49     | -7.37       | 3     | 2.46             | 0.38          | 0.54          |
| <b>Ti</b> | -10.73     | -5.28       | 2     | 2.64             | 1.01          | 1.25          |
| <b>V</b>  | -8.95      | -2.92       | 2     | 1.46             | 0.29          | 0.52          |
| <b>Cr</b> | -8.31      | -4.31       | 2     | 2.16             | 1.24          | 1.48          |
| <b>Mn</b> | -8.99      | -5.13       | 2     | 2.57             | 1.38          | 1.62          |
| <b>Fe</b> | -7.16      | -2.29       | 2     | 1.15             | 0.70          | 0.93          |
| <b>Co</b> | -6.22      | -0.95       | 2     | 0.48             | 0.20          | 0.43          |
| <b>Ni</b> | -6.06      | -1.19       | 2     | 0.60             | 0.34          | 0.57          |
| <b>Cu</b> | -6.46      | -2.98       | 2     | 1.49             | 1.64          | 1.88          |
| <b>Zn</b> | -3.70      | -2.58       | 2     | 1.29             | 0.53          | 0.76          |
| <b>Y</b>  | -12.28     | -8.15       | 3     | 2.72             | 0.34          | 0.50          |
| <b>Zr</b> | -12.95     | -6.79       | 4     | 1.70             | 0.25          | 0.37          |
| <b>Nb</b> | -11.55     | -4.57       | 3     | 1.52             | 0.42          | 0.58          |
| <b>Mo</b> | -10.08     | -3.87       | 3     | 1.29             | 1.09          | 1.25          |
| <b>Ru</b> | -7.75      | -1.08       | 3     | 0.36             | 0.61          | 0.77          |
| <b>Rh</b> | -6.87      | -1.25       | 3     | 0.42             | 1.17          | 1.33          |
| <b>Pd</b> | -5.02      | -1.31       | 2     | 0.66             | 1.61          | 1.84          |
| <b>Ag</b> | -3.76      | -1.27       | 1     | 1.27             | 2.07          | 2.54          |
| <b>Hf</b> | -12.93     | -6.53       | 4     | 1.63             | 0.08          | 0.20          |
| <b>Ta</b> | -12.52     | -4.25       | 3     | 1.42             | 0.82          | 0.97          |
| <b>W</b>  | -10.39     | -1.32       | 3     | 0.44             | 0.54          | 0.70          |
| <b>Re</b> | -8.56      | -0.74       | 3     | 0.25             | 0.55          | 0.70          |
| <b>Os</b> | -8.19      | <b>0.10</b> | 8     | -0.01            | 0.83          | 0.89          |
| <b>Ir</b> | -7.64      | -0.32       | 3     | 0.11             | 1.26          | 1.42          |
| <b>Pt</b> | -6.22      | -0.72       | 2     | 0.36             | 1.54          | 1.78          |
| <b>Au</b> | -3.63      | -0.64       | 1     | 0.64             | 2.33          | 2.80          |

---

\* data from Ref. 5 for Os and Ref. 6 for others.

The potential of the following reaction ( $E_{dis}$ ) based on the methods in previous work:<sup>7</sup>  $TM^{Z+} + Ze^{-} + g-t-C_4N_3 \rightarrow TM@g-t-C_4N_3$ , where  $Z$  represents the number of electrons transferred in the reaction. As listed in Table S1. The value of  $E_{dis}$  for Ni@g-t-C<sub>4</sub>N<sub>3</sub> is 0.57 V, which indicates the Ni@g-t-C<sub>4</sub>N<sub>3</sub> might be unstable under the OER/ORR conditions. However, some key factors, for example, the solvent effects, were not considered in our manuscript. Though we found that the solvent effects treated by implicit model have little influence for Gibbs free energy (see Fig. S8), the real effects should be studied more deeply. Therefore, the limitation of our work should be noticed, and simulations under real conditions should be proceeded in future research.

**Table S2.** The adsorption Gibbs free energies (eV) of \*OH, \*O and \*OOH.

| <b>TM</b> | $\Delta G_{*OH}$ | $\Delta G_{*O}$ | $\Delta G_{*OOH}$ | <b>TM</b> | $\Delta G_{*OH}$ | $\Delta G_{*O}$ | $\Delta G_{*OOH}$ |
|-----------|------------------|-----------------|-------------------|-----------|------------------|-----------------|-------------------|
| <b>Sc</b> | -0.38            | 2.14            | 2.88              | <b>Mo</b> | -0.16            | -0.56           | 2.53              |
| <b>Ti</b> | -1.08            | -0.62           | 2.35              | <b>Ru</b> | 0.48             | 1.18            | 3.44              |
| <b>V</b>  | -0.52            | -0.70           | 2.73              | <b>Rh</b> | 1.24             | 2.65            | 4.44              |
| <b>Cr</b> | 0.39             | 0.83            | 3.79              | <b>Pd</b> | 2.10             | 3.31            | 5.01              |
| <b>Mn</b> | 0.63             | 1.83            | 3.90              | <b>Ag</b> | 2.24             | 2.17            | 5.21              |
| <b>Fe</b> | 0.53             | 1.91            | 3.77              | <b>Hf</b> | -2.13            | -0.75           | 1.38              |
| <b>Co</b> | 0.62             | 1.87            | 3.64              | <b>Ta</b> | -1.72            | -2.33           | --                |
| <b>Ni</b> | 0.82             | 2.49            | 4.00              | <b>W</b>  | -0.72            | -1.61           | 1.49              |
| <b>Cu</b> | 1.31             | 3.50            | 4.39              | <b>Re</b> | -0.02            | 0.10            | 2.88              |
| <b>Zn</b> | 1.13             | 1.81            | 4.47              | <b>Ir</b> | 1.12             | 1.60            | 4.05              |
| <b>Y</b>  | -0.15            | 2.75            | 3.22              | <b>Pt</b> | 1.77             | 2.57            | 4.66              |
| <b>Zr</b> | -1.86            | -0.70           | 1.83              | <b>Au</b> | 1.41             | 3.47            | 4.67              |
| <b>Nb</b> | -1.38            | -2.16           | 1.66              |           |                  |                 |                   |

**Table S3.** The energies (eV) of H<sub>2</sub>O and H<sub>2</sub> molecules in gas phase.

| <b>Molecule</b> | <b>H<sub>2</sub>O</b> | <b>H<sub>2</sub></b> |
|-----------------|-----------------------|----------------------|
| <b>Energy</b>   | -14.23                | -6.76                |

**Table S4.** The reaction Gibbs free energies (eV) in OER and ORR processes. The data marked in blue and red represent the PDSs of OER and ORR, respectively.

| <b>TM</b> | $\Delta G_1$ | $\Delta G_2$ | $\Delta G_3$ | $\Delta G_4$ | $\Delta G_5$ | $\Delta G_6$ | $\Delta G_7$ | $\Delta G_8$ |
|-----------|--------------|--------------|--------------|--------------|--------------|--------------|--------------|--------------|
| <b>Sc</b> | -0.38        | 2.52         | 0.74         | 2.04         | -2.04        | -0.74        | -2.52        | 0.38         |
| <b>Ti</b> | -1.08        | 0.46         | 2.97         | 2.57         | -2.57        | -2.97        | -0.46        | 1.08         |
| <b>V</b>  | -0.52        | -0.18        | 3.43         | 2.19         | -2.19        | -3.43        | 0.18         | 0.52         |
| <b>Cr</b> | 0.39         | 0.44         | 2.96         | 1.13         | -1.13        | -2.96        | -0.44        | -0.39        |
| <b>Mn</b> | 0.63         | 1.20         | 2.07         | 1.02         | -1.02        | -2.07        | -1.20        | -0.63        |
| <b>Fe</b> | 0.53         | 1.38         | 1.86         | 1.15         | -1.15        | -1.86        | -1.38        | -0.53        |
| <b>Co</b> | 0.62         | 1.25         | 1.77         | 1.28         | -1.28        | -1.77        | -1.25        | -0.62        |
| <b>Ni</b> | 0.82         | 1.67         | 1.51         | 0.92         | -0.92        | -1.51        | -1.67        | -0.82        |
| <b>Cu</b> | 1.31         | 2.19         | 0.89         | 0.53         | -0.53        | -0.89        | -2.19        | -1.31        |
| <b>Zn</b> | 1.13         | 0.68         | 2.66         | 0.45         | -0.45        | -2.66        | -0.68        | -1.13        |
| <b>Y</b>  | -0.15        | 2.90         | 0.47         | 1.7          | -1.7         | -0.47        | -2.90        | 0.15         |
| <b>Zr</b> | -1.86        | 1.16         | 2.53         | 3.09         | -3.09        | -2.53        | -1.16        | 1.86         |
| <b>Nb</b> | -1.38        | -0.78        | 3.82         | 3.26         | -3.26        | -3.82        | 0.78         | 1.38         |
| <b>Mo</b> | -0.16        | -0.40        | 3.09         | 2.39         | -2.39        | -3.09        | 0.40         | 0.16         |
| <b>Ru</b> | 0.48         | 0.70         | 2.26         | 1.48         | -1.48        | -2.26        | -0.70        | -0.48        |
| <b>Rh</b> | 1.24         | 1.41         | 1.79         | 0.48         | -0.48        | -1.79        | -1.41        | -1.24        |
| <b>Pd</b> | 2.10         | 1.21         | 1.70         | -0.09        | 0.09         | -1.70        | -1.21        | -2.10        |
| <b>Ag</b> | 2.24         | -0.07        | 3.04         | -0.29        | 0.29         | -3.04        | 0.07         | -2.24        |
| <b>Hf</b> | -2.13        | 1.38         | 2.13         | 3.54         | -3.54        | -2.13        | -1.38        | 2.13         |
| <b>W</b>  | -0.72        | -0.89        | 3.10         | 3.43         | -3.43        | -3.10        | 0.89         | 0.72         |
| <b>Re</b> | -0.02        | 0.12         | 2.78         | 2.04         | -2.04        | -2.78        | -0.12        | 0.02         |
| <b>Ir</b> | 1.12         | 0.48         | 2.45         | 0.87         | -0.87        | -2.45        | -0.48        | -1.12        |
| <b>Pt</b> | 1.77         | 0.80         | 2.09         | 0.26         | -0.26        | -2.09        | -0.80        | -1.77        |
| <b>Au</b> | 1.41         | 2.06         | 1.20         | 0.25         | -0.25        | -1.20        | -2.06        | -1.41        |



**Table S5.** The overpotentials (V) of OER and ORR for TM@g-t-C<sub>4</sub>N<sub>3</sub>.

| <b>TM</b> | $\eta^{OER}$ | $\eta^{ORR}$ |
|-----------|--------------|--------------|
| <b>Sc</b> | 1.30         | 1.61         |
| <b>Ti</b> | 1.75         | 2.31         |
| <b>V</b>  | 2.19         | 1.75         |
| <b>Cr</b> | 1.73         | 0.84         |
| <b>Mn</b> | 0.84         | 0.60         |
| <b>Fe</b> | 0.63         | 0.70         |
| <b>Co</b> | 0.54         | 0.61         |
| <b>Ni</b> | 0.44         | 0.41         |
| <b>Cu</b> | 0.96         | 0.70         |
| <b>Zn</b> | 1.43         | 0.78         |
| <b>Y</b>  | 1.67         | 1.38         |
| <b>Zr</b> | 1.86         | 3.09         |
| <b>Nb</b> | 2.58         | 2.61         |
| <b>Mo</b> | 1.85         | 1.63         |
| <b>Ru</b> | 1.03         | 0.75         |
| <b>Rh</b> | 0.56         | 0.75         |
| <b>Pd</b> | 0.87         | 1.32         |
| <b>Ag</b> | 1.81         | 1.52         |
| <b>Hf</b> | 2.31         | 3.36         |
| <b>Ta</b> | --           | --           |
| <b>W</b>  | 2.20         | 2.12         |
| <b>Re</b> | 1.56         | 1.25         |
| <b>Ir</b> | 1.22         | 0.74         |
| <b>Pt</b> | 0.86         | 0.97         |
| <b>Au</b> | 0.83         | 0.98         |

**Table S6.** The spin-up (UP) and spin-down (DW) projected d-band centers (eV) of anchored TMs.

| TM        | $\varepsilon_d$ |       | $\varepsilon_{d_{z^2}}$ |       | $\varepsilon_{d_{xz}}$ |       | $\varepsilon_{d_{yz}}$ |       | $\varepsilon_{d_{xy}}$ |       | $\varepsilon_{d_{x^2-y^2}}$ |       |
|-----------|-----------------|-------|-------------------------|-------|------------------------|-------|------------------------|-------|------------------------|-------|-----------------------------|-------|
|           | UP              | DW    | UP                      | DW    | UP                     | DW    | UP                     | DW    | UP                     | DW    | UP                          | DW    |
| <b>Sc</b> | 1.72            | 1.72  | 1.67                    | 1.67  | 1.52                   | 1.49  | 1.50                   | 1.49  | 2.06                   | 2.06  | 2.05                        | 2.06  |
| <b>Ti</b> | 0.74            | 1.57  | 0.51                    | 2.08  | 0.77                   | 1.53  | 0.77                   | 1.53  | 0.90                   | 1.43  | 0.89                        | 1.43  |
| <b>V</b>  | -0.08           | 1.85  | 0.05                    | 2.45  | -0.11                  | 1.92  | -0.19                  | 2.19  | -0.04                  | 1.42  | -0.01                       | 1.46  |
| <b>Cr</b> | -0.90           | 2.17  | -0.67                   | 2.72  | -0.99                  | 2.42  | -1.01                  | 2.42  | -0.89                  | 1.70  | -0.89                       | 1.71  |
| <b>Mn</b> | -2.42           | 1.66  | -2.57                   | 1.66  | -2.63                  | 1.58  | -2.65                  | 1.57  | -2.12                  | 1.77  | -2.11                       | 1.78  |
| <b>Fe</b> | -0.45           | -0.32 | -0.04                   | 0.13  | -0.62                  | 0.14  | -0.45                  | -0.07 | -0.65                  | -0.73 | -0.43                       | -0.97 |
| <b>Co</b> | -2.45           | 0.02  | -1.89                   | -0.02 | -2.42                  | 0.23  | -2.27                  | 0.06  | -2.88                  | -0.15 | -2.88                       | -0.06 |
| <b>Ni</b> | -1.05           | -0.99 | -0.39                   | -0.35 | -0.68                  | -0.64 | -0.83                  | -0.79 | -1.54                  | -1.45 | -1.61                       | -1.52 |
| <b>Cu</b> | -1.71           | -1.94 | -1.56                   | -1.7  | -1.66                  | -1.83 | -1.78                  | -1.94 | -1.68                  | -2.08 | -1.83                       | -2.08 |
| <b>Zn</b> | -6.09           | -6.08 | -6.14                   | -6.14 | -6.15                  | -6.14 | -6.27                  | -6.26 | -5.94                  | -5.93 | -5.91                       | -5.90 |
| <b>Y</b>  | 3.89            | 3.87  | 3.72                    | 3.73  | 3.34                   | 3.36  | 3.33                   | 3.36  | 4.34                   | 4.37  | 4.35                        | 4.35  |
| <b>Zr</b> | 1.84            | 2.18  | 1.57                    | 2.39  | 1.42                   | 1.70  | 1.42                   | 1.69  | 2.48                   | 2.64  | 2.48                        | 2.64  |
| <b>Nb</b> | 0.45            | 1.35  | 0.29                    | 1.87  | 0.04                   | 0.99  | 0.03                   | 1.00  | 1.00                   | 1.53  | 1.00                        | 1.53  |
| <b>Mo</b> | -0.47           | 1.34  | -0.24                   | 1.87  | -0.80                  | 1.52  | -0.80                  | 1.52  | -0.19                  | 1.04  | -0.19                       | 1.03  |
| <b>Ru</b> | -1.39           | -0.47 | -1.20                   | 0.52  | -1.30                  | -0.54 | -1.29                  | -0.54 | -1.49                  | -0.80 | -1.50                       | -0.80 |
| <b>Rh</b> | -0.93           | -0.71 | -0.16                   | -0.02 | -0.75                  | -0.47 | -0.74                  | -0.47 | -1.41                  | -1.21 | -1.41                       | -1.21 |
| <b>Pd</b> | -1.45           | -1.46 | -0.95                   | -0.95 | -1.33                  | -1.32 | -1.32                  | -1.32 | -1.79                  | -1.80 | -1.79                       | -1.80 |
| <b>Ag</b> | -2.85           | -2.84 | -2.73                   | -2.72 | -2.91                  | -2.90 | -2.91                  | -2.90 | -2.82                  | -2.81 | -2.82                       | -2.81 |
| <b>Hf</b> | 2.12            | 2.48  | 1.79                    | 2.80  | 1.84                   | 2.19  | 1.85                   | 2.19  | 2.72                   | 2.79  | 2.72                        | 2.80  |
| <b>Ta</b> | 0.29            | 0.97  | 0.13                    | 1.57  | 0.08                   | 0.82  | 0.09                   | 0.81  | 0.80                   | 1.05  | 0.80                        | 1.06  |
| <b>W</b>  | -0.28           | 1.23  | -0.09                   | 1.78  | -0.66                  | 1.37  | -0.66                  | 1.36  | 0.15                   | 1.01  | 0.15                        | 1.02  |
| <b>Re</b> | -1.54           | -0.01 | -1.37                   | 0.68  | -1.89                  | -0.03 | -1.89                  | -0.02 | -1.15                  | -0.19 | -1.15                       | -0.20 |
| <b>Ir</b> | -1.01           | -0.84 | -0.11                   | -0.01 | -0.83                  | -0.61 | -0.84                  | -0.61 | -1.51                  | -1.37 | -1.51                       | -1.37 |
| <b>Pt</b> | -1.68           | -1.69 | -1.03                   | -1.04 | -1.55                  | -1.56 | -1.56                  | -1.56 | -2.05                  | -2.07 | -2.06                       | -2.07 |
| <b>Au</b> | -2.77           | -2.84 | -2.54                   | -2.58 | -2.86                  | -2.88 | -2.86                  | -2.88 | -2.80                  | -2.92 | -2.81                       | -2.92 |

**Table S7.** The linear relationship between projected band centers of  $d_{xz}$ ,  $d_{yz}$ ,  $d_{xy}$ ,  $d_{x^2-y^2}$ , group  $d_{xz}$ - $d_{yz}$ , group  $d_{xy}$ - $d_{x^2-y^2}$  and  $d_{z^2}$ -band center in spin-up (UP) and spin-down (DW) channels.

| <b>orbitals<br/>(UP)</b> | <b>Linear equation</b>                                         | <b>R<sup>2</sup></b> | <b>orbitals<br/>(DW)</b> | <b>Linear equation</b>                                         | <b>R<sup>2</sup></b> |
|--------------------------|----------------------------------------------------------------|----------------------|--------------------------|----------------------------------------------------------------|----------------------|
| $d_{xz}$                 | $\varepsilon_{d_{xz}} = 0.99\varepsilon_{d_{z^2}} - 0.29$      | 0.98                 | $d_{xz}$                 | $\varepsilon_{d_{xz}} = 0.95\varepsilon_{d_{z^2}} - 0.38$      | 0.98                 |
| $d_{yz}$                 | $\varepsilon_{d_{yz}} = 1.00\varepsilon_{d_{z^2}} - 0.30$      | 0.99                 | $d_{yz}$                 | $\varepsilon_{d_{yz}} = 0.96\varepsilon_{d_{z^2}} - 0.40$      | 0.99                 |
| $d_{xy}$                 | $\varepsilon_{d_{xy}} = 1.10\varepsilon_{d_{z^2}} - 0.05$      | 0.91                 | $d_{xy}$                 | $\varepsilon_{d_{xy}} = 1.01\varepsilon_{d_{z^2}} - 0.53$      | 0.94                 |
| $d_{x^2-y^2}$            | $\varepsilon_{d_{x^2-y^2}} = 1.10\varepsilon_{d_{z^2}} - 0.04$ | 0.91                 | $d_{x^2-y^2}$            | $\varepsilon_{d_{x^2-y^2}} = 1.01\varepsilon_{d_{z^2}} - 0.53$ | 0.93                 |
| $d_{xz}$ & $d_{yz}$      | $\varepsilon_{d_1} = 1.00\varepsilon_{d_{z^2}} - 0.29$         | 0.98                 | $d_{xz}$ & $d_{yz}$      | $\varepsilon_{d_1} = 0.95\varepsilon_{d_{z^2}} - 0.39$         | 0.98                 |
| $d_{xy}$ & $d_{x^2-y^2}$ | $\varepsilon_{d_2} = 1.10\varepsilon_{d_{z^2}} - 0.05$         | 0.91                 | $d_{xy}$ & $d_{x^2-y^2}$ | $\varepsilon_{d_2} = 1.00\varepsilon_{d_{z^2}} - 0.53$         | 0.94                 |

## References

1. X. Chen, Q. Liu, H. Zhang and X. Zhao, Exploring high-efficiency electrocatalysts of metal-doped two-dimensional C<sub>4</sub>N for oxygen reduction, oxygen evolution, and hydrogen evolution reactions by first-principles screening, *Phys. Chem. Chem. Phys.*, 2022, **24**, 26061-26069.
2. G. V. Gibbs, D. F. Cox, N. L. Ross, T. D. Crawford, R. T. Downs and J. B. Burt, Comparison of the electron localization function and deformation electron density maps for selected earth materials, *J. Phys. Chem. A*, 2005, **109**, 10022-10027.
3. S. Dong, C. Li, E. Lv, J. Wang, H. Liu, Z. Gao, W. Xiong, Z. Ding, W. Yang and H. Li, MgH<sub>2</sub>/single-atom heterojunctions: effective hydrogen storage materials with facile dehydrogenation, *J. Mater. Chem. A*, 2022, **10**, 19839-19851.
4. C.-S. Yin, Y. Leng, X. Yang, C.-G. Min, A.-M. Ren, Unraveling the mechanism of pyrrole and N-defect regulating CoN<sub>4</sub> single atom catalysts as a pH-universal bifunctional electrocatalyst for OER and ORR, *Appl. Surf. Sci.*, 2024, **643**, 158605.
5. X. Guo, J. Gu, S. Lin, S. Zhang, Z. Chen, S. Huang, Tackling the Activity and Selectivity Challenges of Electro-catalysts toward the Nitrogen Reduction Reaction via Atomically Dispersed Biatom Catalysts, *J. Am. Chem. Soc.* 2020, **142**, 5709–5721.
6. David R. Lide, ed., CRC Handbook of Chemistry and Physics, Internet Version 2005, <<http://www.hbcpnetbase.com>>, CRC Press, Boca Raton, FL, 2005.
7. A. S. Dobrota, N. V. Skorodumova, S. V. Mentus, I. A. Pašti, Surface pourbaix plots of M@N<sub>4</sub>-graphene single-atom electrocatalysts from density functional theory thermodynamic modeling, *Electrochimica Acta* 2022, **412**, 140155.
